# Supplementary material
Source: HighWire-hosted journal article supplement (https://cmaj.ca/highwire/filestream/58380/field_highwire_adjunct_files/0/five-anti-appendix_1.pdf)
Supplement: five-anti-appendix_1.pdf [file five-anti-appendix_1.pdf]

**Appendix 1:** Suggested time frames for temporary discontinuation of specific medications before non-emergent interventional radiology procedures\*

| Medication                                         | Time frame for discontinuation before procedure                                                                                  | Comments                                                                                                                                                                                                                |
|----------------------------------------------------|----------------------------------------------------------------------------------------------------------------------------------|-------------------------------------------------------------------------------------------------------------------------------------------------------------------------------------------------------------------------|
| Warfarin                                           | 5 days, with repeat blood test before procedure to ensure INR < 1.5 (or < 2.0 depending on the procedure and the local practice) | Clinical effect indicated by INR                                                                                                                                                                                        |
| ASA                                                | 5–7 days                                                                                                                         | ASA is an irreversible platelet aggregator inhibitor; because the typical lifespan of platelets is about 10 days, patients taking ASA may be prone to bleeding for up to 7–10 days following its cessation <sup>1</sup> |
| Antiplatelet agent (e.g., clopidogrel)             | 5 days                                                                                                                           | Clopidogrel results in irreversible platelet inhibition                                                                                                                                                                 |
| NSAID                                              | 24 hours                                                                                                                         | NSAIDs generally do not cause significant bleeding problems, except in patients with existing coagulopathies <sup>2</sup>                                                                                               |
| Heparin, unfractionated; intravenous               | 4 hours                                                                                                                          | Clinical effect indicated by aPTT                                                                                                                                                                                       |
| Prophylactic heparin, unfractionated; subcutaneous | No need to stop                                                                                                                  | Clinical effect indicated by aPTT                                                                                                                                                                                       |
| Low-molecular-weight heparin                       | 12 hours – prophylactic dosing<br>24 hours – therapeutic dosing                                                                  | Low-molecular-weight heparin does not affect INR or aPTT                                                                                                                                                                |

Note: ASA = acetylsalicylic acid, aPPT = activated partial thromboplastin time, INR = international normalized ratio.

\*In cases where the referring clinician is unsure, consultation with the treating radiologist is recommended.

Source: Department of Radiology, Lakeridge Health Corporation, Oshawa, Ont.

## References

1. Daniel NG, Goulet J, Bergeron M, et al. Antiplatelet drugs: Is there a surgical risk? *J Can Dent Assoc* 2002;68:683-7a.
2. Mannucci C, Douketis JD. The management of patients who require temporary reversal of vitamin K antagonists for surgery: a practical guide for clinicians. *Intern Emerg Med* 2006;1:96-104.
